# Supplementary material for: Highly Compressible Plastic and Superionic Ice
Source: Research Square preprint supplement (doi:10.21203/rs.3.rs-8118931/v1), 2025-12-04
Supplement: Supplementary file 1 [file 1d38ee13574ce4e4077cf0f2.docx]

**Supplementary information**

**Highly Compressible Plastic and Superionic Ice**

Luo Li1,2, Zihan Zhang3*, Yingxin Yu1, Xinyang Li3*,

Zhu Mao1,2*, Xinyue Zhang1, Xin Tao1, Yanyao Zhang4, Dongzhou Zhang5, Ningyu Sun1, Yu He6, Zhigang Zhang7

**Supplementary Discussion**

**Section 1.** **The definition of each phase of ice at high P-T**

**Section 2. The details of the workflow**

**Section 1. The definition of each phase of ice at high P-T**

The typical characteristics of the high P-T ice phases are shown in Table 1. All the phases in this study exhibit similar body-center cubic (bcc) lattice of O atoms, and the dynamics are identified based on the behaviors of H atoms, which are constrained from AIMD simulations in this work. All the AIMD simulations exhibit balance states of free energy and satisfy the ergodic principle, and no constraint of positions of O and H atoms was applied to the AIMD simulations. Therefore, all the identified dynamic phases are thermostable and the definitions of all the ice phases are shown as below:

**Ice-VII**: Because Ice-VII is expected widely distributed to icy planets, it has received extensive research interest in the past several decades. At 300 K, water crystalizes into ice VI at ~1 GPa and transitions to ice-VII at ~2 GPa and maintains the stable phase up to ~40 GPa. In our study, Ice-VII also exists along 500 K isotherm up to 27.2 GPa. O atoms exist in bcc lattice with two covalent H-O bonds and two hydrogen bonds, and angle of hydrogen-bond network is about 110°. H atoms are fixed to one the nearest O atom.

**Ice VII’**: Similar to ice-VII, O atoms with this phase has shown same characteristics. But H atoms could hop from the nearest O atom (covalent bonding) to the second nearest O atom (hydrogen bonding), resulting in the transition from covalent bonds O-H to hydrogen bonds. With increasing pressure, the distance between adjacent H atoms within ice-VII get shorter and enable the hopping to form ice VII’.

**Ice X**: At higher pressure, the H atoms only distribute within the central range of adjacent O atoms and exhibit hydrogen-bond symmetrization. As a result, O atoms exist in bcc lattice with four-coordinated states and angle of covalent-bond network is about 110°. H atoms are fixed in the center of two adjacent O atoms.

**Plastic ice VII**: At high temperatures, O atoms exist in bcc lattice with two covalent H-O bonds, and polarity of covalent bonds changes randomly but hydrogen-bond network doesn’t change. Therefore, O atoms exhibit two hydrogen bonds on macro average. In general, plastic phase exhibits a molecular rotation. The mechanism is enhanced and prohibited by increasing temperature and pressure, respectively.

**Plastic ice VII’**: This is a special phase with molecular rotation and hopping. Shorter distance between adjacent H atoms would enable the hopping to form ice VII’. But the molecular retard the hopping. Along the isotherm, the effect of molecular rotation on hopping gets weaker with increasing pressure because its rotation rate is continuously decreasing.

**Ice-like superionic ice**: O atoms exist in bcc lattice, and H atoms diffuse randomly but hydrogen-bond network doesn’t change. This phase still maintains the Bernal-Fowler rules with four-coordinated states. Therefore, O atoms exhibit two hydrogen bonds on macro average.

**Water-like superionic**: A superionic state with a crystalline oxygen framework and highly liquid-like proton diffusion that extensively disrupts the hydrogen-bond network. Dissociation fractions can exceed one-half, and MSD of hydrogen becomes extremely large. This regime exhibits the strongest compressibility anomalies among the high-T phases.

**Section 2. The details of the workflow**

The workflow is proposed based on the necessary condition of the ice rule: every H atom has and only has one covalent bond and one hydrogen bond in ice. If states from AIMD simulations nicely fit the ice rule, the necessary condition of the ice rule will also be present. Therefore, the workflow to identify the states from the results of AIMD simulations fit based on ice rule are shown following:

**Step 1**. For every H atom in the list of snapshots, the shortest H-O bond and the second shortest H-O bond are identified as covalent bond and hydrogen bond, respectively.

**Step 2**. Based on the hydrogen-bond and covalent-bond network from step 1, count the number of hydrogen and covalent bonds for every O atom in the list of snapshots, respectively.

**Step 3**. Calculate the dissociation fractions of covalent and hydrogen bonds of snapshots. Dissociation fractions of covalent bonds are calculated using:

where and are number of O atoms and O atoms with 2 covalent bonds, respectively. Notably, if phases nicely fit ice rules, all the O atoms will be identified with 2 covalent bonds and vanishes.

Dissociation fractions of hydrogen bonds are calculated using:

where and are number of O atoms and O atoms with 2 hydrogen bonds, respectively. Notably, if phases nicely fit ice rules, all the O atoms will be identified with 2 hydrogen bonds and vanishes.

**Step 4**. If both and are close to 0, the phase from AIMD simulation will be identified as ice VII. Because both covalent and hydrogen bonds are intact.

**Step 5**. If both is close to 0 but is much larger than 0, the phase from AIMD simulation will be identified as plasitic ice. Because only covalent bonds is intact.

**Step 6**. If both  is much larger than 0 and is close to , the phase from AIMD simulation with be identified as ice VII’. Because all the broken hydrogen bonds form covalent bonds.

**Step 7**. If both is much larger than 0 and is much larger to , the phase from AIMD simulation will be identified as superionic ice. Because hydrogen atoms could diffuse in this state.

**Step 8**. If the phase from AIMD simulation is identified as superionic ice and the angles of hydrogen bond is close to 110°. The phase from AIMD simulation will be further identified as ice-like superionic ice. Because the hydrogen-bond network doesn’t change during diffusion of hydrogen.

**Step 9**. If the phase from AIMD simulation is identified as superionic ice and the angles of hydrogen bond is not around 110°. The phase from AIMD simulation will be further identified as water-like superionic ice. Because the hydrogen-bond network was broken during diffusion of hydrogen.
